# Supplementary material
Source: PubMed Central journal article supplement (PMC10112195)
Supplement: NIHMS1880374-supplement-Supplementary_Table.pdf [file NIHMS1880374-supplement-Supplementary_Table.pdf]

**Supplementary information**

---

**Advances in bladder cancer biology and therapy**

---

In the format provided by the authors and unedited

**Supplementary Table 1.**

|             | <b>Nomenclatures</b>                                                                                                                                                                    |                                                                          |                                                                                                                                                       |                                                                                                                                                                      |                                                                                                                                                                                                                                                 |                                                  |
|-------------|-----------------------------------------------------------------------------------------------------------------------------------------------------------------------------------------|--------------------------------------------------------------------------|-------------------------------------------------------------------------------------------------------------------------------------------------------|----------------------------------------------------------------------------------------------------------------------------------------------------------------------|-------------------------------------------------------------------------------------------------------------------------------------------------------------------------------------------------------------------------------------------------|--------------------------------------------------|
| <b>UNC</b>  | <b>Luminal</b>                                                                                                                                                                          |                                                                          | <b>Claudin-low</b>                                                                                                                                    |                                                                                                                                                                      | <b>Basal-like</b>                                                                                                                                                                                                                               |                                                  |
|             | luminal markers (UPK2, UPK1B, UPK3A); mutation of FGFR3, KDM6A; TSC1 mutation & deletion                                                                                                |                                                                          | amplification of EGFR, PPARG; mutations of RB1, EP300 and NCOR1; immune gene signature (CD274, IDO1, FASLG, CTLA4, PD1, LAG3, HAVCR2, PDCD1LG2, IL10) |                                                                                                                                                                      | Basal markers (CD44, KRT14, KRT5, KRT6B, KRT20); RB1 mutations & deletion; amplification of CCND1, E2F3 and CCNE1;                                                                                                                              |                                                  |
| <b>MDA</b>  | <b>Luminal</b>                                                                                                                                                                          |                                                                          | <b>TP53-like</b>                                                                                                                                      |                                                                                                                                                                      | <b>Basal</b>                                                                                                                                                                                                                                    |                                                  |
|             | PPAR $\gamma$ activation; luminal markers (CD24, FOXA1, GATA3, ERBB2, ERBB3, XBP1, and KRT20); estrogen receptor transcription; FGFR3 mutations                                         |                                                                          | P53 pathway genes; resistant to neoadjuvant chemotherapy                                                                                              |                                                                                                                                                                      | P63 activation; basal markers (CD44, KRT5, KRT6, KRT14, and CDH3); squamous differentiation; aggressive                                                                                                                                         |                                                  |
| <b>TCGA</b> | <b>Cluster I</b>                                                                                                                                                                        |                                                                          | <b>Cluster II</b>                                                                                                                                     | <b>Cluster III</b>                                                                                                                                                   |                                                                                                                                                                                                                                                 | <b>Cluster IV</b>                                |
|             | focally amplified; PPARG, and EGFR amplification; MLL2 mutations; DNA hypermethylation; miR-200a-3P; miR200b-3P                                                                         |                                                                          | Papillary-like FGFR3 mutation; CDKN2A deletion                                                                                                        | TP53/cell-cycle-mutant; squamous features (KRT5, KRT6A, KRT14); TP53 mutation; RB1 mutations; E2F3 and CCND1 amplification                                           |                                                                                                                                                                                                                                                 | miR-99a-5p; miR-100-5P                           |
| <b>TCGA</b> | <b>Luminal Papillary</b>                                                                                                                                                                | <b>Luminal</b>                                                           | <b>Neuronal</b>                                                                                                                                       | <b>Luminal Infiltrated</b>                                                                                                                                           | <b>Basal/squamous</b>                                                                                                                                                                                                                           |                                                  |
|             | luminal marker (high UPK2, UPK1A); differentiation marker (FOXA1, GATA3, PPARG); sonic Hedgehog (SHH, BMP5); high CDH1, ERBB2 expression; FGFR3 mutations; Papillary histology; Low CIS | Luminal markers (KRT20+, GATA3+, FOXA1+); TP53 mutation; CDKN2A deletion | Neuronal-differentiation; typical neuroendocrine markers; TP53 and RB1 loss; E2F3/SOX4 amp p53/cell-cycle pathway; SOX2; DLX6; MSI1; PLEKHG4B         | Luminal markers (KRT20+, GATA3+, FOXA1+); Wild type p53; Low purity; EMT markers (TWIST1, ZEB1); miR-200 family; Medium CD274 (PD-L1), CTLA-4; Myofibroblast markers | basal and stem cell markers (CD44, KRT5, KRT6A, KRT14) and squamous differentiation markers (TGM1, DSC3, PI3); Immune markers (High CD274 (PD-L1), CTLA4); high immune infiltrates; TP53 mutations; loss of SHH signaling; high EGFR expression |                                                  |
| <b>LUND</b> | <b>Urothelial-like (Uro.)</b>                                                                                                                                                           | <b>Genomically unstable (GU)</b>                                         | <b>Epithelial-infiltrated (Epi-Inf)</b>                                                                                                               | <b>Basal/SCC</b>                                                                                                                                                     | <b>Mesenchyma-like</b>                                                                                                                                                                                                                          | <b>Small-cell /Neuroendocrine-like (Sc/NE)</b>   |
|             | urothelial differentiation signature (RXRA, PPARG, FOXA1, GATA3); FGFR3+, CCND1+, RB1+, and E2F3-; CDKN2A deletions/mutations                                                           | urothelial differentiation signature; FGFR3-, CCND1-, RB1-, and E2F3+    | urothelial differentiation signature (RXRA, PPARG, FOXA1, GATA3); Uro and GU tumour-cell phenotypes                                                   | Basal markers KRT5/KRT14-high; high CDH3                                                                                                                             | strong ECM signature; high ZEB2 and VIM                                                                                                                                                                                                         | overexpression of E2F3, CDKAL1, SOX4, and MBOAT1 |

**Supplementary Table 1. Summary of Major Bladder Cancer Subtype Classification Studies:**

Summary of major bladder cancer subtype classification studies including the University of North Carolina (UNC)<sup>8,34</sup>, MD Anderson Cancer Center (MDA)<sup>10</sup>, The Cancer Genome Atlas Network (TCGA)<sup>7,35</sup>, and LUND taxonomy<sup>12</sup>. Classifications, differentiation markers, gene expression signatures, and genetic alterations (including mutation, deletion and amplifications) in various systems are displayed. "+" highly expressed; "-" not expressed or not detected.
